# Supplementary material
Source: PubMed Central journal article supplement (PMC3839419)
Supplement: NIHMS509553-supplement-1.pdf [file NIHMS509553-supplement-1.pdf]

## IgW BAC Classification

| name      | Grid position | VH detected | W6 PCR | total # clusters |
|-----------|---------------|-------------|--------|------------------|
| <b>1</b>  | Gc_Ba 002W6   | W2A         | 0      | 2                |
| <b>2</b>  | Gc_Ba 363A16  | W6          | +      | 1                |
| <b>3</b>  | Gc_Ba 184C9   | W1GL; W6    | +      | 2                |
| <b>4</b>  | Gc_Ba 205L5   | W3; W6      | +      | 2                |
| <b>5</b>  | Gc_Ba 286K1   | W1; W6      | +      | 2                |
| <b>6</b>  | Gc_Ba 328E1   | W3; W6      | +      | 2                |
| <b>7</b>  | Gc_Ba 302E4   | W6          | +      | 1                |
| <b>8</b>  | Gc_Ba 457I1   | W2A         | 0      | 2                |
| <b>9</b>  | Gc_Ba 511G8   | W6          | +      | 1                |
| <b>10</b> | Gc_Ba 492O1   | W2B         | 0      | 1                |
| <b>11</b> | Gc_Ba 566P3   | W6          | +      | 1                |
| <b>13</b> | Gc_Ba 642B7   | W2B         | 0      | 2                |
| <b>15</b> | Gc_Ba 679I7   | W1          | 0      | 1                |
| <b>16</b> | Gc_Ba 718F2   | W5          | 0      | 1                |
| <b>17</b> | Gc_Ba 765M14  | W6          | +      | 1                |
| <b>18</b> | Gc_Ba 778I5   | W6          | +      | 1                |
| <b>19</b> | Gc_Ba 001L18  | W1GL; W6    | +      | 2                |
| <b>20</b> | Gc_Ba 011N13  | W1; W6      | +      | 2                |
| <b>21</b> | Gc_Ba 030P20  | W6          | +      | 1                |
| <b>22</b> | Gc_Ba 035P7   | W6          | +      | 1                |
| <b>23</b> | Gc_Ba 036M8   | W2A; W6     | +      | 2                |
| <b>24</b> | Gc_Ba 046J23  | W2A; W6     | +      | 2                |
| <b>25</b> | Gc_Ba 048J14  | W5          | 0      | 1                |
| <b>26</b> | Gc_Ba 063I18  | W3          | 0      | 2                |
| <b>27</b> | Gc_Ba 070W19  | W1; W6      | +      | 2                |
| <b>28</b> | Gc_Ba 073J19  | W2B         | 0      | 1                |
| <b>29</b> | Gc_Ba 083H20  | W3GL        | 0      | 1                |
| <b>30</b> | Gc_Ba 094B19  | W3          | 0      | 2                |
| <b>31</b> | Gc_Ba 100H18  | W3; W6      | +      | 2                |
| <b>32</b> | Gc_Ba 100K10  | W2B         | 0      | 1                |
| <b>34</b> | Gc_Ba 133E10  | W2A; W6     | +      | 2                |

| name      | Grid position | VH detected | W6 PCR | total # clusters |
|-----------|---------------|-------------|--------|------------------|
| <b>35</b> | Gc_Ba 134F9   | W3GL        | 0      | 1                |
| <b>36</b> | Gc_Ba 146M1   | W6          | +      | 1                |
| <b>37</b> | Gc_Ba 149D10  | W5          | 0      | 1                |
| <b>39</b> | Gc_Ba 160J4   | W6          | +      | 1                |
| <b>41</b> | Gc_Ba 162J24  | W2A; W6     | +      | 2                |
| <b>42</b> | Gc_Ba 163I23  | W2A; W6     | +      | 2                |
| <b>43</b> | Gc_Ba 164E24  | W2B         | 0      | 1                |
| <b>44</b> | Gc_Ba 171C11  | W3          | 0      | 2                |
| <b>45</b> | Gc_Ba 183D24  | W2B         | 0      | 2                |
| <b>46</b> | Gc_Ba 195C9   | W3GL; W6    | +      | 2                |
| <b>47</b> | Gc_Ba 206W21  | W5          | 0      | 1                |
| <b>48</b> | Gc_Ba 213D4   | W2A         | 0      | 2                |
| <b>50</b> | Gc_Ba 214H18  | W1GL; W6    | +      | 2                |
| <b>52</b> | Gc_Ba 221F13  | W2B         | 0      | 1                |
| <b>53</b> | Gc_Ba 227A10  | W3GL; W6    | +      | 2                |
| <b>54</b> | Gc_Ba 227F12  | W6          | +      | 1                |
| <b>55</b> | Gc_Ba 238C10  | W3GL; W3    | 0      | 2                |
| <b>56</b> | Gc_Ba 239L2   | W6          | +      | 1                |
| <b>57</b> | Gc_Ba 241N17  | W1          | 0      | 1                |
| <b>58</b> | Gc_Ba 256J17  | W1GL        | 0      | 1                |
| <b>60</b> | Gc_Ba 298M24  | W5          | 0      | 1                |
| <b>61</b> | Gc_Ba 302D10  | W1GL        | 0      | 1                |
| <b>62</b> | Gc_Ba 302W1   | W3GL; W6    | +      | 2                |
| <b>64</b> | Gc_Ba 305D9   | W1GL        | 0      | 1                |
| <b>65</b> | Gc_Ba 310E17  | W3; W6      | +      | 2                |
| <b>66</b> | Gc_Ba 319E24  | W1          | 0      | 1                |
| <b>67</b> | Gc_Ba 322B13  | W6          | +      | 1                |
| <b>68</b> | Gc_Ba 322B14  | W6          | +      | 1                |
| <b>69</b> | Gc_Ba 328D19  | W3          | 0      | 2                |
| <b>70</b> | Gc_Ba 339W20  | W1GL; W6    | +      | 2                |
| <b>71</b> | Gc_Ba 345B20  | W1          | 0      | 1                |
