# Supplementary material
Source: PubMed Central journal article supplement (PMC3839419)
Supplement: NIHMS509553-supplement-2.pdf [file NIHMS509553-supplement-2.pdf]

|           |                                                                                                                             |
|-----------|-----------------------------------------------------------------------------------------------------------------------------|
| ΨW6CH2sec | TCCATGTCCAGGTGGAATACTGCTCACACTTGTCTCCTTCT-CTTGTTCTGAGTCTCCG-----CCGGTCCTGCTCTACCATACTAGC                                    |
|           | G N T A H T C P P S L V L S L R                                   R S C S T I L A                                           |
| W2CH2sec  | TCCAATTCcagGTGGAAA-----TCCTTGCCCTTGTTCCTCCG-----CCGGTCCTGCTCTACCATACTAGC                                                    |
|           | G N                                                           P C P C S P                                   P V L L Y H T S |
| W2CH4sec  | TCCAATTCtagGTGAAACGTTTTTCATGTCCAAGTGGAATCCTCCTGGCACTTGTCTCCTTGCACATTTGCACCGGAACGTCTACCATACTAAC                              |
|           | E T F S C P S G N P P G T C P P C T F A P E L L Y H T N                                                                     |
| W2cDNA    | GAATGTCCAAGGTGAAACGTTTTTCATGTCCAAGTGGAATCCTCCTGGCACTTGTCTCCTTGCACATTTGCACCGGAACGTCTACCATACTAAC                              |
|           | N V Q G E T F S C P S G N P P G T C P P C T F A P E L L Y H T N                                                             |
|           |                                                                                                                             |
| ΨW6CH2sec | TTTAATGTGACCCTCAGAAATGGTGAAAAACACCAATATTAGTGTGCCAATCAAATGTGTAAAATGAAGTTGTGAGTTCATTGTGAGTGGAACGGC                            |
|           | L M Stop                                                                                                                    |
| W2CH2sec  | CTAAATGTGACCCTCAGAAATGGTGAAAAGCACCAATATAAGTGTGCCAATCAAATGTGTAAAATAAAGTTGTGAGTTCATTGTGAGTGGAACGGC                            |
|           | L N V T L R N G E K H Q Y K C A N Q M C K I K L                                                                             |
| W2CH4sec  | CTCAGTGTGACCCTCAGAAATGGTGAAAAGCACCAATATAAGTGTGACCAACAAAAGTGTCAAATAAAGTTATGAATTCATTCTGAATGGAAGTGGC                           |
|           | L S V T L R N G E K H Q Y K C D Q Q K C Q I K L                                                                             |
| W2cDNA    | CTCAGTGTGACCCTCAGAAATGGTGAAAAGCACCAATATAAGTGTGACCAACAAAAGTGTCAAATAAAGTTATGAATTCATTCTGAA-polyA                               |
|           | L S V T L R N G E K H Q Y K C D Q Q K C Q I K L                                                                             |
